# Supplementary material for: Support vector machine regression (LS-SVM)—an alternative to artificial neural networks (ANNs) for the analysis of quantum chemistry data?
Source: Royal Society of Chemistry journal article supplement (doi:10.1039/c1cp00051a), 2011-01-01
Supplement: c1cp00051a.pdf [file c1cp00051a.pdf]

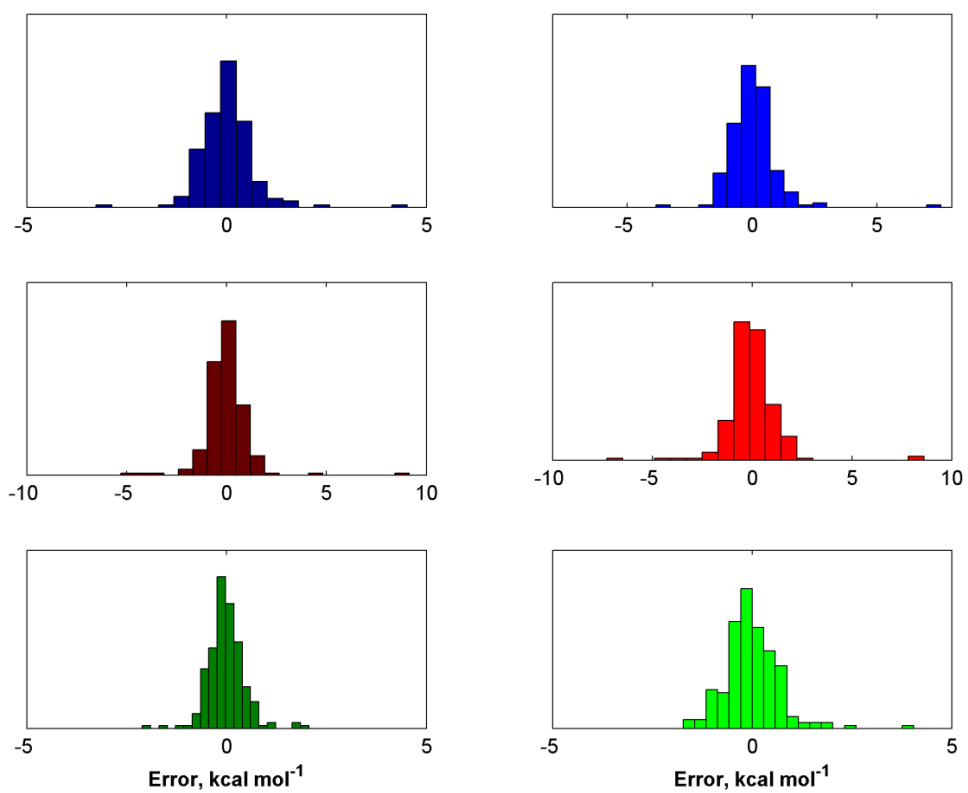

**Figure S1. The error distributions for different DFT methods: (top) B3LYP, (middle) BLYP, (bottom) BMK; (left) 6-311(2df,2pd), (right) 6-311(3df,3pd).**
